# Supplementary material
Source: Springer Nature journal article supplement (https://www.springermedizin.de/resource/supplementary/11689_2013_70_MOESM2_ESM.pdf/9673162)

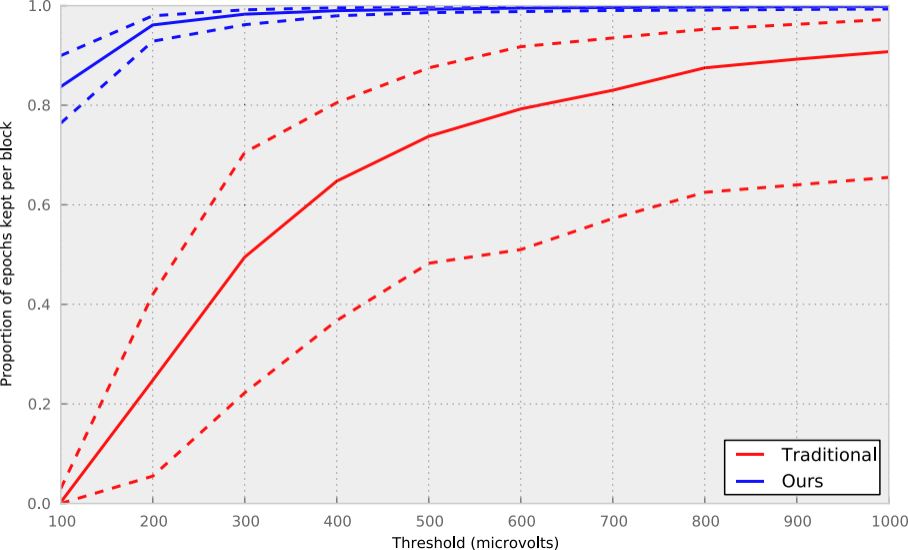

Supplement: MOESM2 [file 9673162]
